# Supplementary material
Source: publisher figshare collection journal article supplement (https://acs.figshare.com/ndownloader/files/13034657)
Supplement: Supplementary file 1 [file 13034657]

## SUPPORTING INFORMATION

### Thermoresponsive Supramolecular Hydrogels with High Fracture Toughness

Fei Wang and R. A. Weiss\*

Department of Polymer Engineering, University of Akron, Akron, OH 44325

#### Part 1: Video of pure shear test for notched NF10 hydrogel.

#### Part 2: Calculation of crosslink density of the NFx hydrogels.

An effective crosslink density of the supramolecular hydrogels was calculated from the phantom network model<sup>1</sup> for rubber elasticity using the tensile modulus data, assuming a Poisson ratio of 0.5 and using the volume of the swollen hydrogel as the reference volume.

$$G = \frac{E}{3} = \left(1 - \frac{2}{f}\right) \nu_e RT \phi_2^{\frac{1}{3}} \quad (S1)$$

where  $G$  is the shear modulus,  $\nu_e$  is the crosslink density,  $f$  is the functionality of the crosslinks and  $\phi_2$  is the volume fraction of polymer in the fully swollen hydrogel,

$$\phi_2 = \left[1 + \frac{(q-1)\rho}{d}\right]^{-1} \quad (S2)$$

Where  $q$  is the swelling ratio (mass of hydrogel/mass of dry polymer),  $d$  is the solvent (water) density ( $1.00 \text{ g}\cdot\text{cm}^{-3}$ ) and  $\rho$  is the density of the dry NFx copolymers ( $1.21 \text{ g}\cdot\text{cm}^{-3}$ ,  $1.25 \text{ g}\cdot\text{cm}^{-3}$ ,  $1.28 \text{ g}\cdot\text{cm}^{-3}$  and  $1.34 \text{ g}\cdot\text{cm}^{-3}$  for NF5, NF8, NF10 and NF14, respectively).

Each FOSA group is attached to two NIPAM chains, so each FOSA—FOSA supramolecular bond produces four network chains. Thus the functionality,  $f$ , of a nanodomain crosslinks is twice the number of FOSA groups within the nanodomain ( $N_{agg}$ ). Values for  $N_{agg}$ , determined by small angle neutron scattering<sup>2</sup> for NF5, NF10 and NF10 hydrogels at temperatures

between 9°C and 13°C vary from ~29 – 59, values of  $f$  for the NFx hydrogels used in the present study were estimated to be  $f = 2N_{agg} \sim 60 - 120$ . Thus, the  $2/f$  term in Equation (1) is essentially negligible and

$$\nu_e \approx \frac{E}{3RT\phi_2^{1/3}} \quad (S3)$$

### Part 3: Tensile tests of samples with various notch sizes (crack lengths)

Pure shear tests following the method described by Rivlin and Thomas<sup>3</sup> and using the same type of specimen used for the pure shear tests described in the paper, except that the crack length,  $c$ , was varied were used to calculate the fracture energy of the NF10 hydrogel. Figure S1 shows the measured tensile force,  $F$ , vs. strain for NF10 specimens with initial crack lengths of 1 – 9 mm. The work,  $W$ , required to deform that sample to a specific strain,  $\epsilon_L$ , is the area under the  $F$ - $\epsilon$  curves integrated to  $\epsilon = \epsilon_L$ . Figure S2 shows the initial crack length dependence on  $W$  measured at a constant strain of  $\epsilon_L = 476\%$ , which was the fracture strain for the sample with the 9 mm notch. The  $W$ - $c$  data were fit with a linear least squares regression, solid line in Figure S2, and the slope of the line was  $\left(\frac{\partial U}{\partial c}\right)_{\epsilon_L} = -(4.62 \pm 0.76) \text{ J/m}$ . The fracture energy is given by equation (S4)<sup>3</sup>.

$$\Gamma = -\frac{1}{t} \left(\frac{\partial U}{\partial c}\right)_{\epsilon_L} \quad (S4)$$

where  $t$  = specimen film thickness. In this case  $\Gamma = 6.3 \pm 1.0) \text{ kJ/m}^2$ , which is comparable to the value determined from the pure shear analysis of Suo et al.<sup>4</sup> of  $\Gamma = 7.8 \pm 1.1) \text{ kJ/m}^2$ .

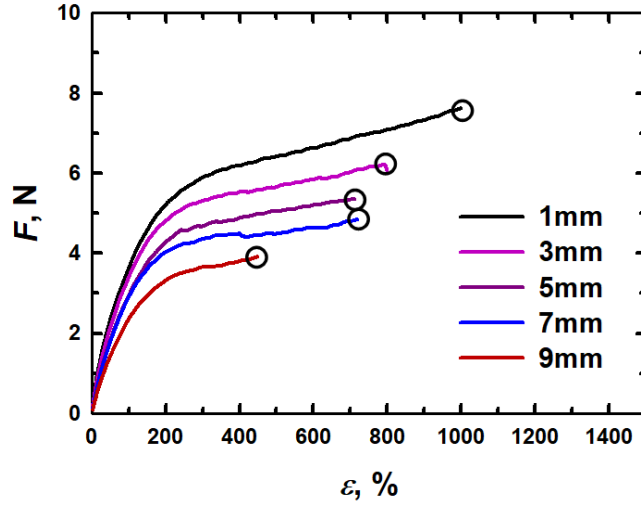

**Figure S1.**  $F$  versus strain curves at 5°C for NF10 hydrogel samples with various notch length. The circles indicate the strain at which the notch began to propagate.

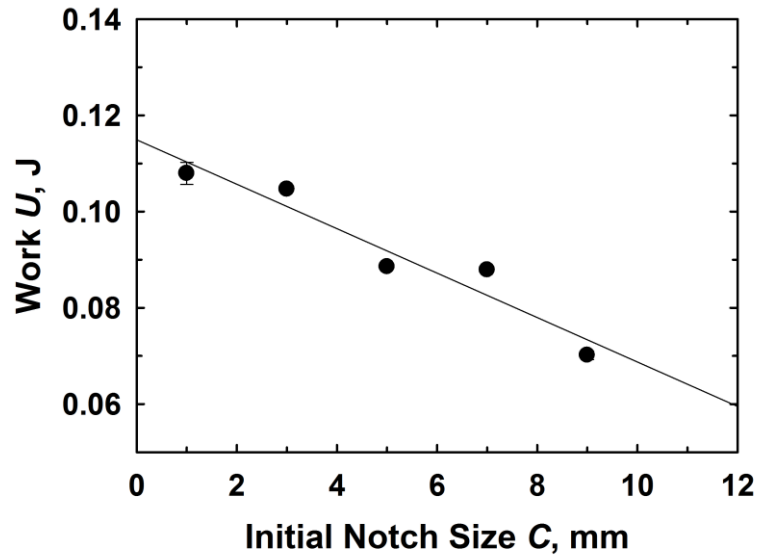

**Figure S2.** Work  $U$  versus initial notch size  $C$  for the NF10 hydrogel at 5°C. A linear least squares fit is shown. The slope is  $\left(\frac{\partial U}{\partial c}\right)_{\epsilon_L} = -(4.62 \pm 0.76) \text{ J/m}$ .

## References

---

1. Treloar, L. R. G. *The Physics of Rubber Elasticity*; Oxford University Press, 1975.
2. Tian, J.; Seery, T. A. P.; Ho, D. L.; Weiss, R. A. *Macromolecules* **2004**, *37*, 10001.
3. Rivlin, R. S.; Thomas, A. G. Rupture of rubber. I. Characteristic energy for tearing. *J. Polym. Sci.* 1953, *10*, 291.
4. Sun, J.-Y.; Zhao, X.; Illeperuma, W. R. K.; Chaudhuri, O.; Oh, K. H. O.; Mooney, D. J.; Vlassak, J. J.; Suo, Z. Highly stretchable and tough hydrogels. *Nature* **2012**, *489*, 133.
